# Supplementary material for: Photochromic and fluorescence switching properties of oxidized triangle terarylenes in solution and in amorphous solid states
Source: Royal Society of Chemistry journal article supplement (doi:10.1039/c1jm12993g), 2011-01-01
Supplement: c1jm12993g.pdf [file c1jm12993g.pdf]

## Electronic Supplementary Information for

### Photochromic and fluorescence switching properties of oxidized triangle terarylenes in solution and in amorphous solid states†

Maki Taguchi,<sup>a</sup> Tetsuya Nakagawa,<sup>a,b</sup> Takuya Nakashima,<sup>a</sup> and Tsuyoshi Kawai\*<sup>a</sup>

<sup>a</sup> Graduate School of Materials Science, Nara Institute of Science and Technology, NAIST, 8916-5 Takayama, Ikoma, Nara 630-0192, Japan

E-mail: tkawai@ms.naist.jp; Fax: +81-743-72-6179; Tel: +81-743-72-6170

<sup>b</sup> Present Address: Center for Organic Photonics and Electronics Research, OPERA, Kyushu University, 744 Motoooka, Nishi, Fukuoka, 819-0395, Japan

#### Table of contents

1. Schemes of photochemical reactions and photochemical properties of precursors **P1**, **P2**, **P3** and **P4**
2. Photographs of compounds **1**, **2**, **3** and **4** in 2-MeTHF in quartz cells
3. Crystallographic data for compounds **1b** and **3b**
4. Quantum chemical calculations for compounds **1-3** by *Gaussian 03* at B3LYP/6-31G(d) level
5. Emission decay and lifetime of compounds **1b**, **2b**, **3b** and **4b** in 2-MeTH.
6. DSC profile of **1b**

1. Schemes of photochemical reactions and photochemical properties of precursors **P1-P4**

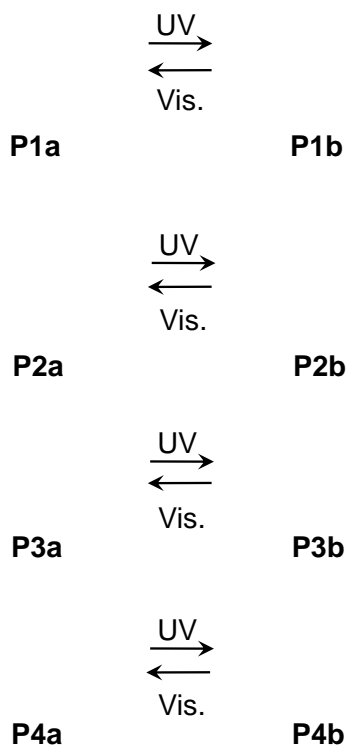

**Scheme S1** Molecular structures of photochromic molecules **P1-P4**.

**Table S1** Absorption properties and photochromic properties of precursor **P1-P4** in hexane

|                         | $\lambda$ [nm]<br>( $\epsilon$ [ $10^4 \text{ M}^{-1} \text{ cm}^{-1}$ ]) | $a_{\text{pss}}$<br>(at 313 nm) | $\Phi_{\text{oc}}$<br>(at 313 nm) | $\Phi_{\text{co}}$ |
|-------------------------|---------------------------------------------------------------------------|---------------------------------|-----------------------------------|--------------------|
| <b>P1a</b> <sup>a</sup> | 269 (3.5)                                                                 | 0.90                            | 0.6                               | —                  |
| <b>P1b</b> <sup>a</sup> | 610 (0.94)                                                                | —                               | —                                 | 0.07 <sup>e</sup>  |
| <b>P2a</b> <sup>b</sup> | 273 (2.2)                                                                 | 0.44                            | 0.58                              | —                  |
|                         | 329 (1.3)                                                                 |                                 |                                   |                    |
| <b>P2b</b> <sup>b</sup> | 539 (1.2)                                                                 | —                               | —                                 | 0.45 <sup>f</sup>  |
|                         | 556 (1.2)                                                                 |                                 |                                   |                    |
| <b>P3a</b> <sup>c</sup> | 262 (2.8)                                                                 | 0.79                            | 0.46                              | —                  |
| <b>P3b</b> <sup>c</sup> | 562 (1.1)                                                                 | —                               | —                                 | 0.015 <sup>e</sup> |
| <b>P4a</b> <sup>d</sup> | 258 (1.4)                                                                 | 0.50                            | 0.35                              | —                  |
| <b>P4b</b> <sup>d</sup> | 517 (0.91)                                                                | —                               | —                                 | 0.35 <sup>f</sup>  |

<sup>a</sup>T. Nakashima, K. Atsumi, S. Kawai, T. Nakagawa, Y. Hasegawa and T. Kawai, *Eur. J. Org. Chem.*, 2007, 3212-3218. <sup>b</sup>S. Kawai, T. Nakashima, Y. Kutsunugi, H. Nakagawa, H. Nakano and T. Kawai, *J. Mater. Chem.*, 2009, **19**, 3606-3611. <sup>c</sup>M. Irie, K. Sakemura, M. Okinaka and K. Uchida, *J. Org. Chem.*, 1995, **60**, 8305-8309. <sup>d</sup>K. Uchida, E. Tsuchida, Y. Aoi, S. Nakamura and M. Irie, *Chem. Lett.*, 1999, 63-64. <sup>e</sup>irrad at 546 nm <sup>f</sup>irrad at 517 nm

2. Photographs of compounds 1, 2, 3 and 4 in 2-MeTHF in quartz cells

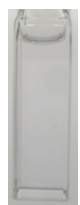

**1a**

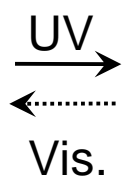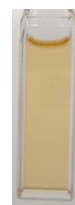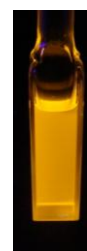

**1b**

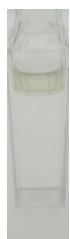

**2a**

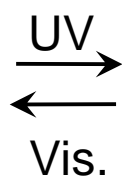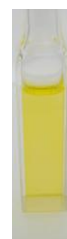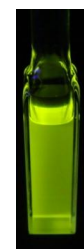

**2b**

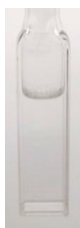

**3a**

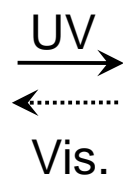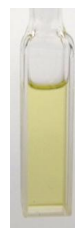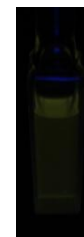

**3b**

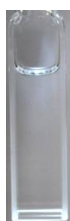

**4a**

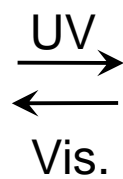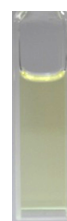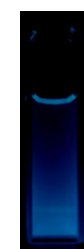

**4b**

### 3. Crystallographic data for compounds **1b** and **3b**

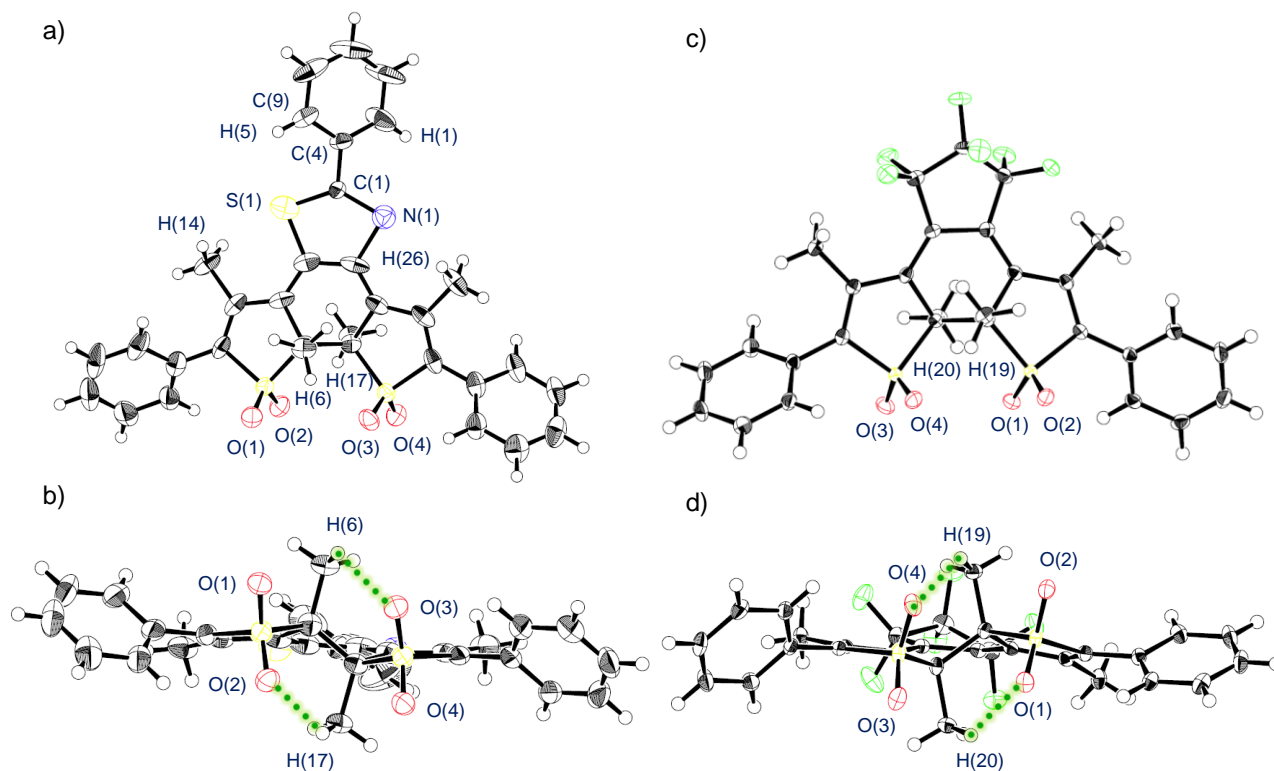

**Fig. S1** ORTEP drawings of **1b** and **3b** in crystal, showing 50 % probability displacement ellipsoids; (a) the front view of **1b**, (b) the edge view of **1b**, (c) the front view of **3b** and (d) the edge view of **3b**.

**Table S2** Distance between hydrogen atoms of methyl groups and oxygen atoms of SO<sub>2</sub> units evaluated by the X-ray crystallographic structures.

|           | CH / OS distance [nm] |                |
|-----------|-----------------------|----------------|
| <b>1b</b> | 0.231 (H17/O2)        | 0.239 (H6/O3)  |
| <b>3b</b> | 0.231 (H19/O4)        | 0.234 (H20/O1) |

4. Quantum chemical calculations for compounds **1-3** by Gaussian 03 at B3LYP/6-31G(d) level

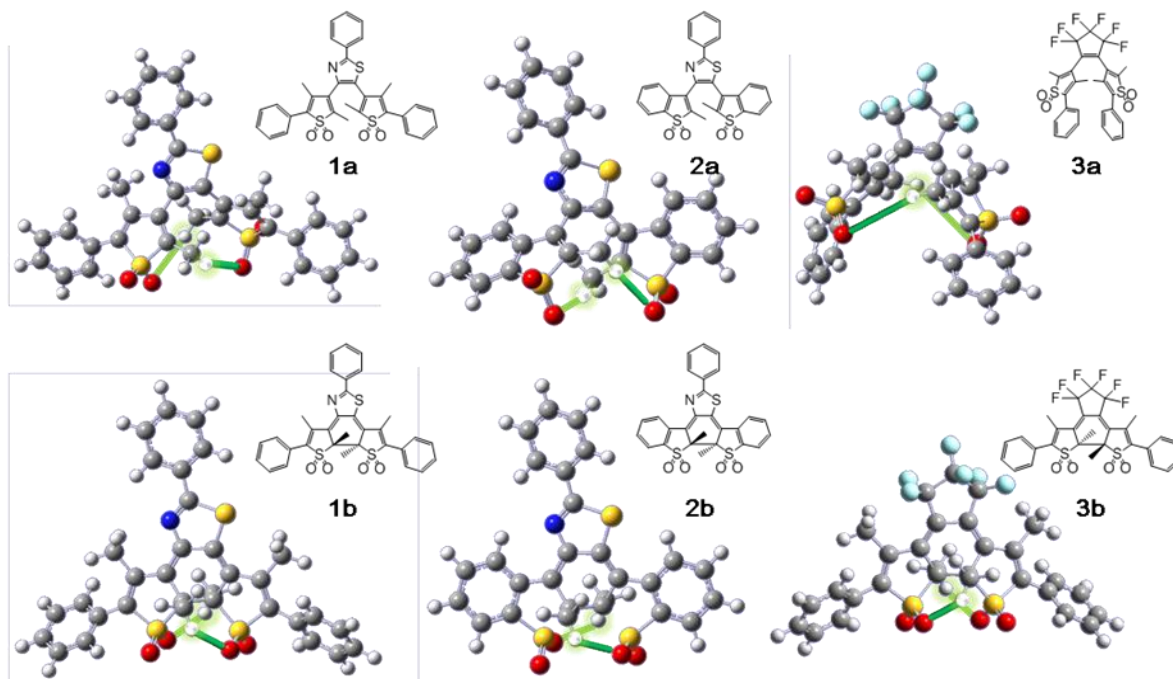

**Fig. S2** Optimized molecular structures of **1a**, **1b**, **2a**, **2b**, **3a** and **3b** evaluated with DFT calculations in B3LYP/6-31G(d) level

**Table S3** Distance between hydrogen atoms of methyl groups and oxygen atoms of SO<sub>2</sub> units evaluated with the DFT calculations in Fig. S2

| compound  | CH / OS distance [nm] |       |
|-----------|-----------------------|-------|
| <b>1a</b> | 0.306                 | 0.311 |
| <b>1b</b> | 0.224                 | 0.224 |
| <b>2a</b> | 0.315                 | 0.310 |
| <b>2b</b> | 0.222                 | 0.222 |
| <b>3a</b> | 0.390                 | 0.382 |
| <b>3b</b> | 0.226                 | 0.225 |

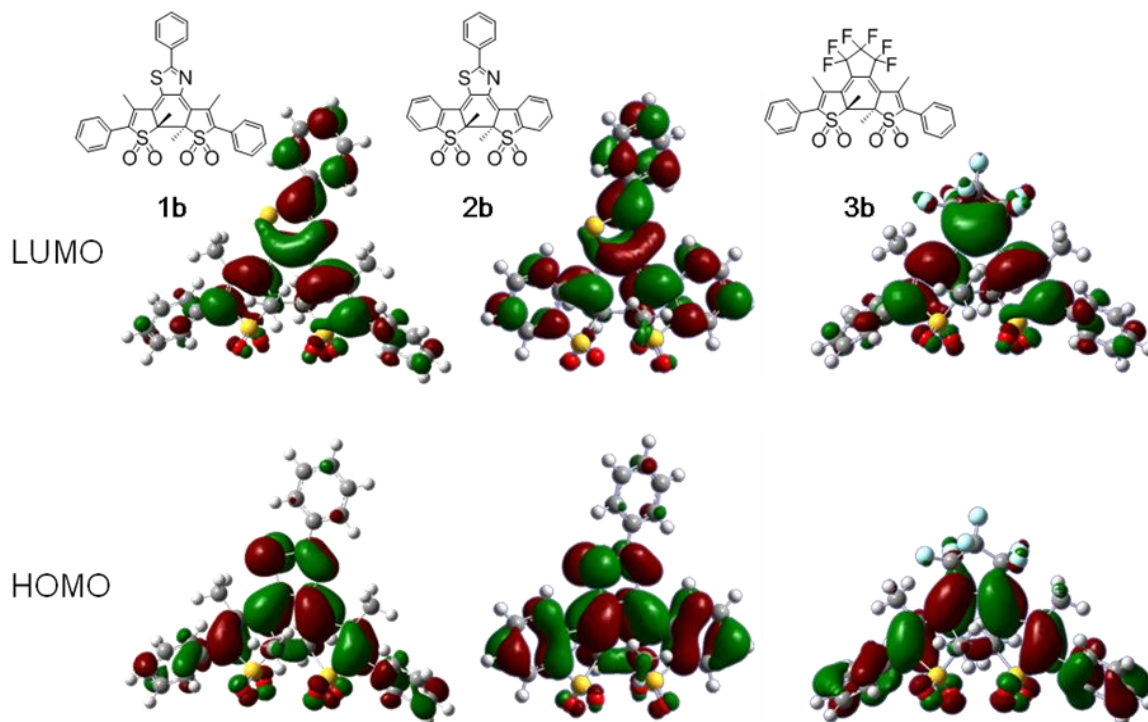

**Fig. S3** HOMO and LUMO of ring-closed isomers **1b**, **2b** and **3b** calculated by TD-DFT (B3LYP/6-31G(d))

**Table S4** HOMO and LUMO levels and first transition bands of compounds

| compound   | HOMO [eV] | LUMO [eV] | first transition band [nm] (oscillator strength) |
|------------|-----------|-----------|--------------------------------------------------|
| <b>P1b</b> | -4.3767   | -2.1658   | 649.34 ( $f = 0.2582$ )                          |
| <b>1b</b>  | -5.4886   | -2.8760   | 522.35 ( $f = 0.4117$ )                          |
| <b>P2b</b> | -4.8341   | -2.3576   | 585.42 ( $f = 0.1998$ )                          |
| <b>2b</b>  | -5.6826   | -2.8842   | 487.14 ( $f = 0.3363$ )                          |
| <b>P3b</b> | -5.0162   | -2.4556   | 573.22 ( $f = 0.2840$ )                          |
| <b>3b</b>  | -6.2897   | -3.2991   | 464.45 ( $f = 0.5180$ )                          |

**Table S5** Emission quantum yields of **1b**, **2b**, **3b** and **4b** in various solvents

|           | $\lambda_{\text{ex}}$<br>[nm] | $\Phi_{\text{em}}^a$ |             |                   |                                 |                    |
|-----------|-------------------------------|----------------------|-------------|-------------------|---------------------------------|--------------------|
|           |                               | 2-MeTHF              | 1,4-dioxane | toluene           | CH <sub>2</sub> Cl <sub>2</sub> | CH <sub>3</sub> CN |
| <b>1b</b> | 400                           | 0.35                 | 0.36        | 0.33              | 0.32                            | 0.10               |
| <b>2b</b> | 400                           | 0.37                 | 0.33        | 0.45 <sup>c</sup> | 0.29                            | 0.10               |

<sup>a</sup> after N<sub>2</sub> bubbling

5. Emission decay profiles of compounds **1b**, **2b**, **3b** and **4b** in 2-MeTHF at *r.t.*

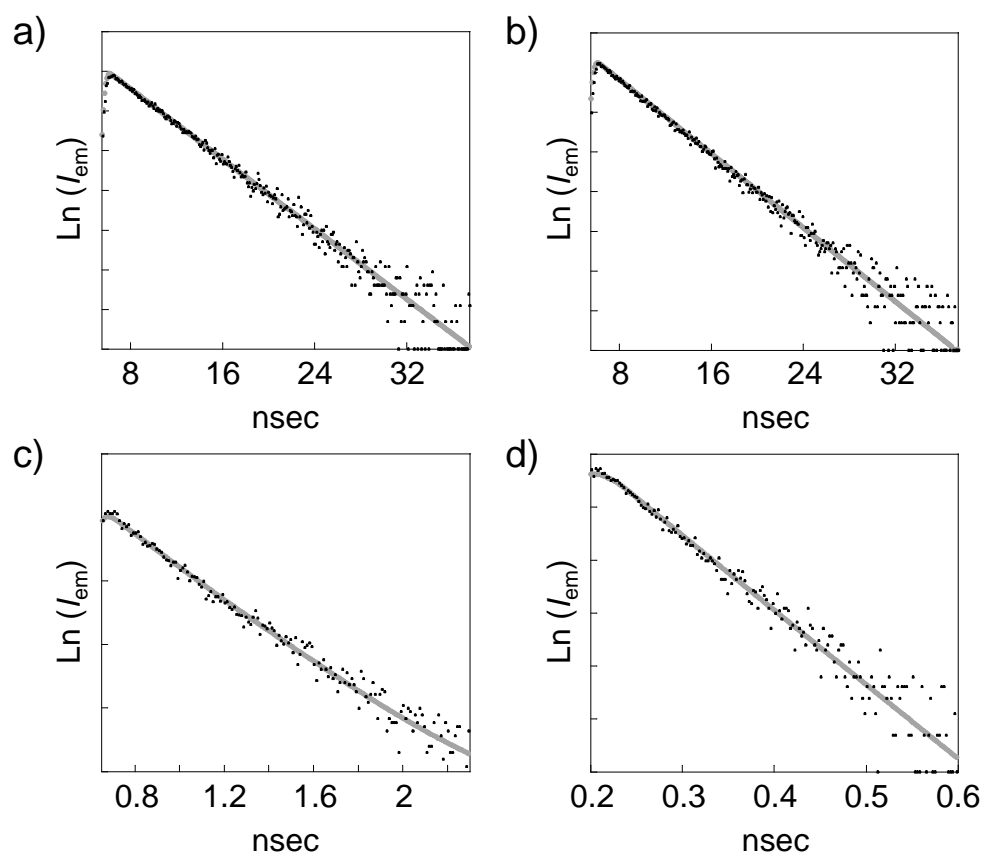

**Fig. S4** Emission decay profiles obtained with the time-resolved fluorescence measurements in 2-MeTHF at *r.t.* (a) **1b** ( $3.0 \times 10^{-5}$  M), (b) **2b** ( $4.5 \times 10^{-5}$  M), (c) **3b** ( $7.8 \times 10^{-5}$  M) and (d) **4b** ( $4.2 \times 10^{-5}$  M). Excitation was performed with a cavity-dumped Ti:Sapphire pulsed laser (Mira 900F & Pulse Switch, Coherent) through a SHG unit (model 5-050, Inrad) of 400 nm in wavelength (pulse width = ca. 90 fsec) with a repetition frequency of 1 Hz. Gray curves denote fitting profiles based on the single exponential decay with time constants presented in **Table 2**.

6. Glass transition temperature of **1b**

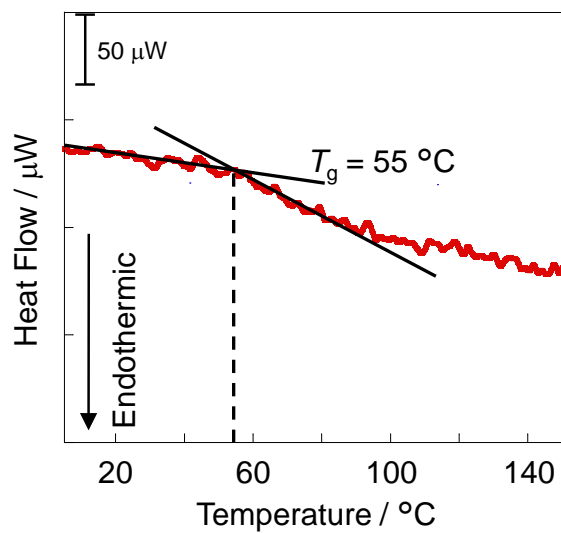

**Fig. S5** DSC curve of compound **1b**
